# Supplementary material for: Higher Levels of Early Childhood Caries (ECC) Is Associated with Developing Psychomotor Deficiency: The Cross- Sectional Bi-Township Analysis for The New Hypothesis
Source: PubMed Central journal article supplement (PMC6747446; doi:10.3390/ijerph16173082), 2019-08-24
Supplement: ijerph-16-03082-s001.pdf [file ijerph-16-03082-s001.pdf]

**Table S1.** The CCDI measured in kindergarteners with different dmft scores detected.

|                           | Classification of dmft |        |          |        |        |        |        |        |          |        |        |          |        |        |          |        |        |          |
|---------------------------|------------------------|--------|----------|--------|--------|--------|--------|--------|----------|--------|--------|----------|--------|--------|----------|--------|--------|----------|
|                           | ≤0                     | ≥1     | p        | ≤1     | ≥2     | p      | ≤2     | ≥3     | p        | ≤3     | ≥4     | p        | ≤4     | ≥5     | p        | ≤5     | ≥6     | p        |
| Gross motor               | 72.66                  | 81.82  | 0.0196 * | 78.49  | 81.52  | 0.3354 | 80.83  | 81.19  | 0.8928   | 79.70  | 81.65  | 0.4511   | 80.53  | 81.39  | 0.7255   | 80.43  | 81.54  | 0.6326   |
| Fine motor                | 98.03                  | 96.57  | 0.7330   | 99.57  | 96.24  | 0.3215 | 100.81 | 95.62  | 0.0286 * | 99.52  | 95.63  | 0.0891   | 99.69  | 95.28  | 0.0512   | 98.73  | 95.42  | 0.1373   |
| Expressive language       | 90.95                  | 90.55  | 0.9229   | 95.01  | 89.90  | 0.1179 | 95.74  | 89.25  | 0.0108 * | 93.91  | 89.36  | 0.0690   | 93.71  | 89.13  | 0.0539   | 92.55  | 89.38  | 0.1651   |
| Comprehension-concept     | 103.93                 | 107.81 | 0.4116   | 108.59 | 107.36 | 0.7395 | 111.93 | 106.40 | 0.0732   | 111.41 | 106.12 | 0.0611   | 111.41 | 105.75 | 0.0349 * | 111.53 | 105.12 | 0.0126 * |
| Situation comprehension   | 87.34                  | 88.49  | 0.8024   | 90.32  | 88.12  | 0.5433 | 92.75  | 87.29  | 0.0579   | 89.33  | 88.06  | 0.6473   | 90.31  | 87.52  | 0.2865   | 89.66  | 87.63  | 0.4207   |
| Self-help                 | 91.30                  | 90.91  | 0.9250   | 94.22  | 90.45  | 0.2405 | 95.50  | 89.79  | 0.0331 * | 93.90  | 89.87  | 0.0979   | 94.20  | 89.45  | 0.0403*  | 92.94  | 89.74  | 0.1506   |
| Personal-social           | 87.86                  | 87.11  | 0.8544   | 89.42  | 86.82  | 0.4168 | 91.50  | 86.05  | 0.0284 * | 90.94  | 85.81  | 0.0272 * | 89.18  | 86.25  | 0.2088   | 88.41  | 86.42  | 0.3751   |
| General development scale | 100.16                 | 102.10 | 0.5932   | 103.39 | 101.74 | 0.5610 | 104.98 | 101.18 | 0.1113   | 103.54 | 101.37 | 0.3184   | 103.81 | 101.10 | 0.1887   | 103.72 | 100.89 | 0.1524   |

  

|                           | classification of dmft |        |          |        |        |          |        |        |          |        |        |          |        |        |        |        |        |        |
|---------------------------|------------------------|--------|----------|--------|--------|----------|--------|--------|----------|--------|--------|----------|--------|--------|--------|--------|--------|--------|
|                           | ≤6                     | ≥7     | p        | ≤7     | ≥8     | p        | ≤8     | ≥9     | p        | ≤9     | ≥10    | p        | ≤10    | ≥11    | p      | ≤11    | ≥12    | p      |
| Gross motor               | 80.95                  | 81.24  | 0.8993   | 81.26  | 80.96  | 0.8962   | 81.26  | 80.90  | 0.8793   | 82.15  | 79.00  | 0.2081   | 81.73  | 79.47  | 0.3964 | 81.13  | 81.03  | 0.9717 |
| Fine motor                | 99.64                  | 94.27  | 0.0157 * | 99.55  | 93.68  | 0.0094 * | 98.41  | 94.23  | 0.0688   | 98.55  | 93.01  | 0.0291 * | 97.98  | 93.31  | 0.0896 | 97.52  | 93.70  | 0.1610 |
| Expressive language       | 92.94                  | 88.66  | 0.0545   | 92.59  | 88.47  | 0.0625   | 91.72  | 88.98  | 0.2218   | 92.09  | 87.65  | 0.0574   | 91.64  | 87.87  | 0.1257 | 91.16  | 88.54  | 0.3264 |
| Comprehension-concept     | 112.62                 | 103.48 | 0.0002 * | 111.37 | 103.45 | 0.0014 * | 109.83 | 104.20 | 0.0261 * | 109.26 | 104.06 | 0.0481 * | 108.94 | 103.80 | 0.0641 | 108.49 | 104.06 | 0.1416 |
| Situation comprehension   | 90.31                  | 86.86  | 0.1595   | 90.40  | 86.30  | 0.0925   | 89.71  | 86.55  | 0.2021   | 89.89  | 85.49  | 0.0873   | 89.55  | 85.44  | 0.1307 | 89.36  | 85.01  | 0.1718 |
| Self-help                 | 93.00                  | 89.29  | 0.0876   | 92.77  | 89.01  | 0.0807   | 92.09  | 89.30  | 0.2036   | 92.16  | 88.53  | 0.1114   | 92.11  | 87.90  | 0.0798 | 91.98  | 87.23  | 0.0678 |
| Personal-social           | 88.05                  | 86.46  | 0.4656   | 87.95  | 86.35  | 0.4603   | 87.26  | 87.03  | 0.9148   | 87.69  | 86.13  | 0.4951   | 87.34  | 86.71  | 0.7931 | 87.32  | 86.61  | 0.7870 |
| General development scale | 104.41                 | 99.98  | 0.0210*  | 104.17 | 99.61  | 0.0169*  | 103.17 | 100.20 | 0.1267   | 103.21 | 99.45  | 0.0638   | 102.88 | 99.55  | 0.1196 | 102.65 | 99.45  | 0.1667 |

  

|                           | classification of dmft |        |        |        |        |        |        |        |        |        |        |        |        |        |        |        |        |        |
|---------------------------|------------------------|--------|--------|--------|--------|--------|--------|--------|--------|--------|--------|--------|--------|--------|--------|--------|--------|--------|
|                           | ≤12                    | ≥13    | p      | ≤13    | ≥14    | p      | ≤14    | ≥15    | p      | ≤15    | ≥16    | p      | ≤16    | ≥17    | p      | ≤17    | ≥18    | p      |
| Gross motor               | 80.47                  | 84.21  | 0.2219 | 80.73  | 83.83  | 0.3789 | 80.99  | 82.58  | 0.7133 | 80.94  | 83.47  | 0.5858 | 81.15  | 80.35  | 0.8895 | 81.20  | 78.34  | 0.6649 |
| Fine motor                | 96.77                  | 96.26  | 0.8648 | 97.01  | 94.45  | 0.4449 | 96.88  | 94.42  | 0.5500 | 96.65  | 97.07  | 0.9227 | 96.73  | 95.61  | 0.8315 | 96.60  | 98.83  | 0.7201 |
| Expressive language       | 90.70                  | 90.01  | 0.8106 | 90.71  | 89.68  | 0.7531 | 90.94  | 86.64  | 0.2835 | 90.91  | 86.35  | 0.2845 | 91.03  | 81.70  | 0.0695 | 90.63  | 89.09  | 0.7997 |
| Comprehension-concept     | 107.98                 | 105.37 | 0.4226 | 107.78 | 105.73 | 0.5800 | 108.00 | 102.10 | 0.1936 | 107.95 | 101.97 | 0.2153 | 107.72 | 103.51 | 0.4718 | 107.53 | 107.07 | 0.9461 |
| Situation comprehension   | 88.52                  | 87.86  | 0.8362 | 88.69  | 86.51  | 0.5466 | 88.82  | 83.77  | 0.2544 | 88.62  | 85.62  | 0.5241 | 88.48  | 86.88  | 0.7791 | 88.19  | 94.52  | 0.3440 |
| Self-help                 | 91.59                  | 87.97  | 0.1998 | 91.40  | 87.88  | 0.2724 | 91.49  | 84.79  | 0.0877 | 91.51  | 83.58  | 0.0568 | 91.38  | 82.28  | 0.0710 | 91.13  | 85.79  | 0.3690 |
| Personal-social           | 87.11                  | 87.43  | 0.9082 | 87.38  | 85.76  | 0.6120 | 87.42  | 84.35  | 0.4324 | 87.32  | 85.23  | 0.6156 | 87.39  | 82.81  | 0.4707 | 87.17  | 87.12  | 0.9939 |
| General development scale | 102.12                 | 101.16 | 0.6993 | 102.19 | 100.39 | 0.5279 | 102.20 | 99.18  | 0.3873 | 102.16 | 99.25  | 0.4332 | 102.11 | 98.88  | 0.4718 | 101.86 | 104.65 | 0.5968 |

\*:  $p < 0.05$ .
